# Supplementary figures and images for: Extracellular Matrix Collagen I Differentially Regulates the Metabolic Plasticity of Pancreatic Ductal Adenocarcinoma Parenchymal Cell and Cancer Stem Cell
Source: MDPI journal article supplement (doi:10.3390/cancers15153868), 2023-07-29

# Gluts

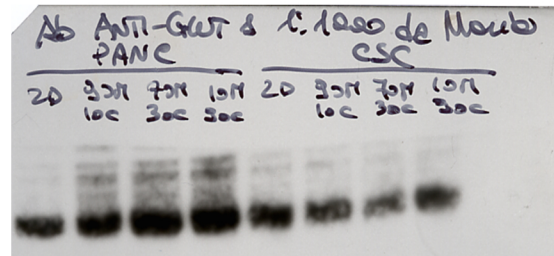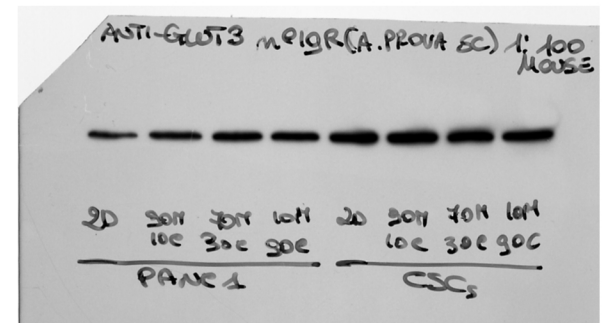

# MCTs

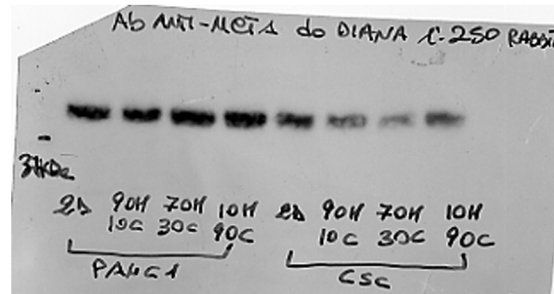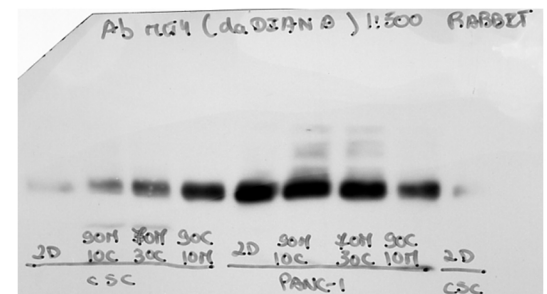

Note that sample loading of MCT4 is opposite that of the other gels

# Actin

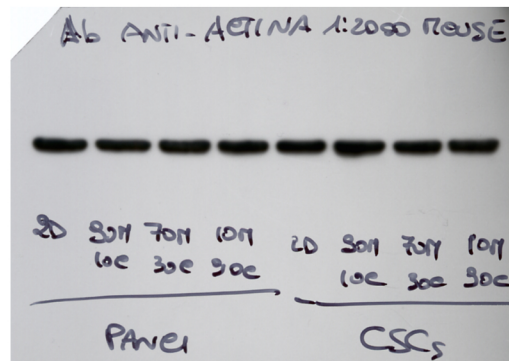

Supplement: s1 [file s1]
